# Supplementary material
Source: HighWire-hosted journal article supplement (https://erj.ersjournals.com/content/54/6/1902065)
Supplement: inline-supplementary-material-1 [file inline-supplementary-material-1.pdf]

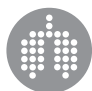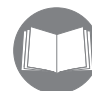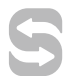

SHAREABLE PDF

# The impact of marijuana smoking on lung function

Robert J. Hancox <sup>1</sup> and Malcolm R. Sears<sup>2</sup>

**Affiliations:** <sup>1</sup>Dept of Preventive and Social Medicine, Dunedin School of Medicine, University of Otago, Dunedin, New Zealand. <sup>2</sup>McMaster University, Dept of Medicine, Hamilton, ON, Canada.

**Correspondence:** Malcolm R. Sears, McMaster University, Dept of Medicine, Hamilton, ON, Canada.  
E-mail: searsm@mcmaster.ca

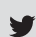

@ERSpublications

**The effects of marijuana smoking on lung function remain to be fully elucidated** <http://bit.ly/36unCEq>

**Cite this article as:** Hancox RJ, Sears MR. The impact of marijuana smoking on lung function. *Eur Respir J* 2019; 54: 1902065 [<https://doi.org/10.1183/13993003.02065-2019>].

This single-page version can be shared freely online.

As marijuana becomes more widely used, and is legalised in several jurisdictions, the question of whether regular marijuana smoking has a deleterious effect on respiratory health, similar to tobacco smoking, has been a major topic of investigation. While multiple studies indicate the potential for development of respiratory symptoms reflecting airway inflammation and chronic bronchitis (dominantly cough, wheeze, and sputum production), studies reporting detailed longitudinal lung function assessments have been substantially fewer.
